# Supplementary material for: A photostable reaction-based A–A–A type two-photon fluorescent probe for rapid detection and imaging of sulfur dioxide
Source: Royal Society of Chemistry journal article supplement (doi:10.1039/d1tb00433f), 2021-01-01
Supplement: d1tb00433f1.pdf [file d1tb00433f1.pdf]

## Supporting Information

### **Photostable Reaction-Based A-A-A Type Two-Photon Fluorescent Probe for Rapidly Detecting and Imaging Sulfur Dioxide**

Qiang Zhang, Xiaoxiao Hu, Xiaomei Dai, Junyong Sun, and Feng Gao\*

Laboratory of Functionalized Molecular Solids, Ministry of Education, Anhui Key Laboratory of Chemo/Biosensing, Laboratory of Biosensing and Bioimaging (LOBAB), College of Chemistry and Materials Science, Anhui Normal University, Wuhu 241002, P. R. China

\*Corresponding author. Phone/Fax: +86-553-3937137. *E-mail*: fgao@mail.ahnu.edu.cn.

## Experimental Procedures

### 1. Instrumental and reagents.

All Reagents were purchased from commercial sources and used without further purification. The zebrafish were acquired from Shanghai FishBio Co., Ltd.

<sup>1</sup>H NMR and <sup>13</sup>C NMR spectra were recorded on a BRUKER ASCEndtm400 MHz instrument. HRMS (high resolution mass spectrometry) spectra were obtained with an Agilent 6200 instrument. Fluorescence and UV absorption spectra were obtained with a PerkinElmer LS-55 fluorescence spectrophotometer and Hitachi U-3900 spectrophotometer, respectively. The absolute fluorescence quantum yields were obtained with an FLS1000 fluorescence spectrophotometer (Edinburgh Instruments Ltd., United Kingdom). The two-photon fluorescence emission spectrums and images were carried out on a confocal laser scanning microscope (TCS SP8, Leica, Germany) equipped with a Ti:Sapphire laser (Chameleon Ultra II, Coherent).

### 2. Measurement of two-photon absorption cross-sections.

Two-photon absorption cross-sections (TPA,  $\sigma$ ) were calculated using the two-photon excited fluorescence method.<sup>1</sup> The two-photon fluorescence emission spectrums at different excitation were collected from confocal laser scanning microscopy with a multiphoton femtosecond laser and all other parameters remain the same during the data collection. The two-photon absorption cross-sections of the samples in PBS buffer (10 mM, pH 7.4) were calculated using fluorescein in pH = 11 aqueous solution as a reference according to eqn.:<sup>2</sup>

$$\sigma_S = \sigma_R \times (S_S / S_R) \times (\Phi_R / \Phi_S) \times (C_R / C_S)$$

In the equation, the subscripts S and R stand for the sample and reference molecules. C is the concentration,  $\Phi$  is the quantum yield, S is two-photon excited fluorescence emission integration at different laser wavelengths, and  $\sigma_R$  is the two-photon cross-section of the reference molecule.

### 3. Zebrafish culture

Zebrafish Culture: 4-day-old larval zebrafishes were used for bio-imaging in vivo. The zebrafish embryos were incubated in E3 embryo media (15 mM NaCl, 0.5 mM KCl, 1 mM MgSO<sub>4</sub>, 1 mM

CaCl<sub>2</sub> , 0.15 mM KH<sub>2</sub>PO<sub>4</sub> , 0.05 mM Na<sub>2</sub>HPO<sub>4</sub>, 0.7 mM NaHCO<sub>3</sub>, 10<sup>-5</sup>% methylene blue, pH 7.5) at 28 °C for four days. Then the 4-day-old larval zebrafishes were used for subsequent imaging experiments.

**Table S1.** Comparison of some fluorescent probes for selective detection SO<sub>2</sub> derivatives.

| Probes                                                                              | OPM/<br>TPM | Detection<br>limit | Response<br>time | TP stability/<br>σ    | References                                                    |
|-------------------------------------------------------------------------------------|-------------|--------------------|------------------|-----------------------|---------------------------------------------------------------|
| 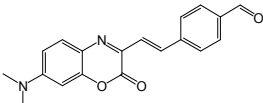   | TPM         | 1.86 μM            | 4.5 min          | -/ 3.9 GM             | <i>J. Mater. Chem. B</i> , 2016, <b>4</b> , 7888-7894         |
|    | OPM         | 530 nM             | 6 min            | -                     | <i>Talanta</i> , 2018, <b>189</b> , 429–436.                  |
|  | TPM         | 50 nM              | 3 min            | -/ 100 GM             | <i>Chem. Commun.</i> , 2016, <b>52</b> , 10289-10292          |
|  | TPM         | 200 nM             | 5 min            | -                     | <i>Sensors and Actuators B</i> , 2018, <b>255</b> , 1228–1237 |
|  | OPM         | 270 pM             | 90 s             | -                     | <i>Chem. Commun.</i> , 2014, <b>50</b> , 183-185.             |
|  | TPM         | 7.12 μM            | 10 s             | -                     | <i>Analyst</i> , 2019, <b>144</b> , 4371–4379.                |
|  | TPM         | 560 nM             | 5 min            | -/ 77 GM              | <i>Sensors and Actuators B</i> , 2016, <b>233</b> , 1–6.      |
|  | TPM         | 190 nM             | 30 s             | Photostable/<br>91 GM | This work                                                     |

“-” indicates that there is not provided or not investigated in the manuscript.

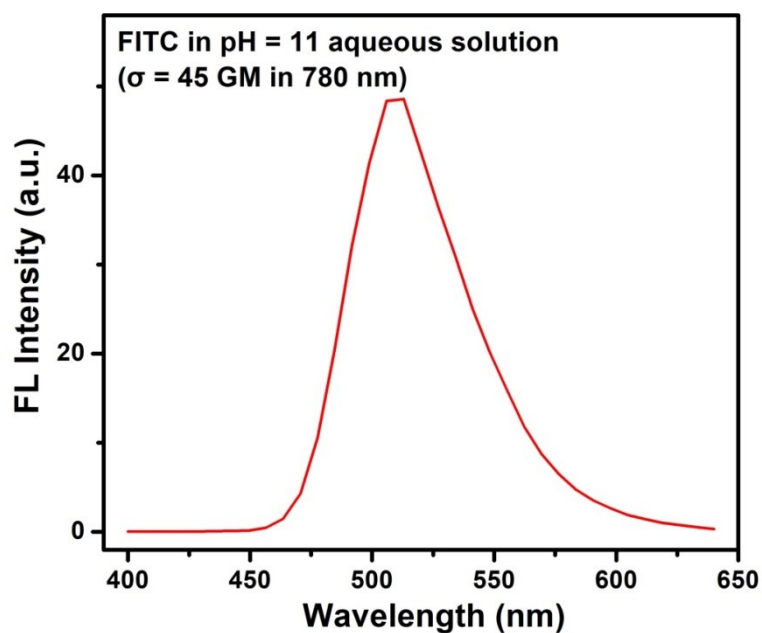

**Figure S1.** Two-photon fluorescence emission spectrum of FITC in pH 11 aqueous solution at a two-photon laser excitation of 780 nm.

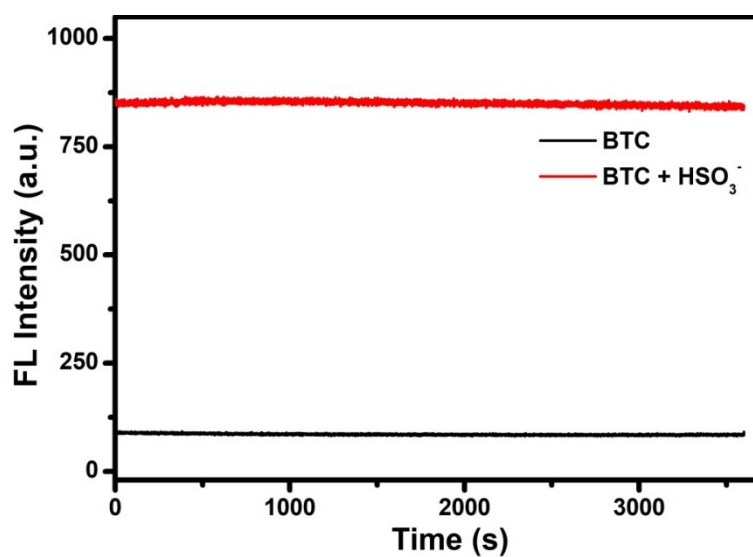

**Figure S2.** Photostability experiment of BTC (black line) and BTC-HSO<sub>3</sub> (BTC reacted with 200  $\mu$ M HSO<sub>3</sub><sup>-</sup>, red line) in 10 mM, pH 7.4 PBS buffer containing 5% DMSO. Voltage of xenon lamp: 700V, slit: 15  $\times$  15, BTC:10  $\mu$ M.

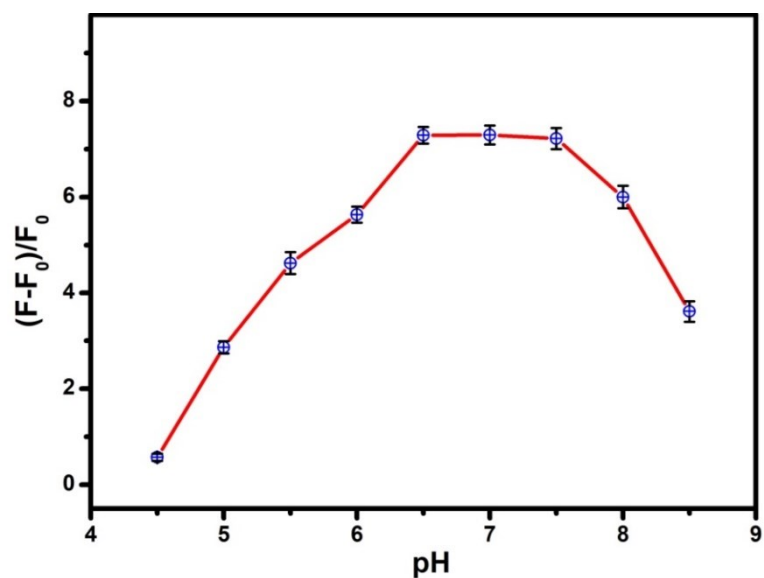

**Figure S3.** The plot of the variation of fluorescence intensity ( $F-F_0/F_0$ ) of 10 $\mu$ M BTC in the presence of 200 $\mu$ M  $\text{HSO}_3^-$  against different pH values in phosphate buffer.  $F$  and  $F_0$  are the fluorescence intensity of BTC in the presence and absence of  $\text{HSO}_3^-$ , respectively.

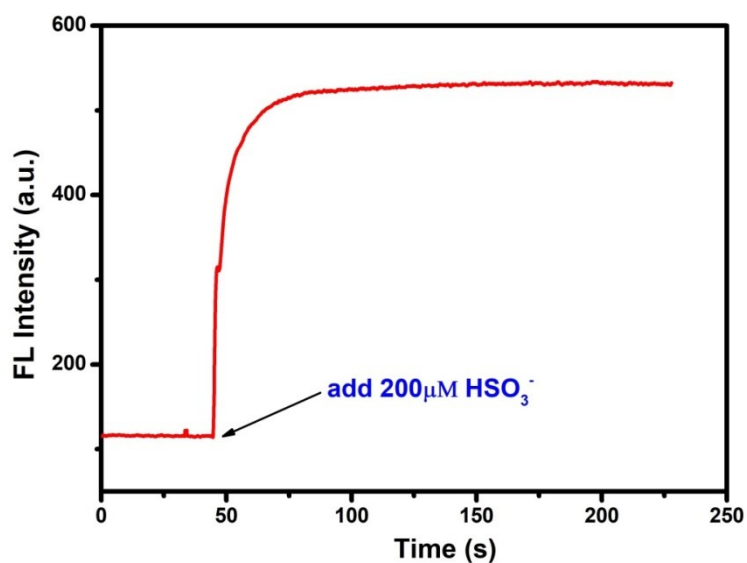

**Figure S4.** Time-dependent fluorescence intensity at 520 nm of 10  $\mu$ M BTC probe in the presence of 200  $\mu$ M  $\text{HSO}_3^-$  in 10 mM, pH 7.4 phosphate buffer containing 5% DMSO.

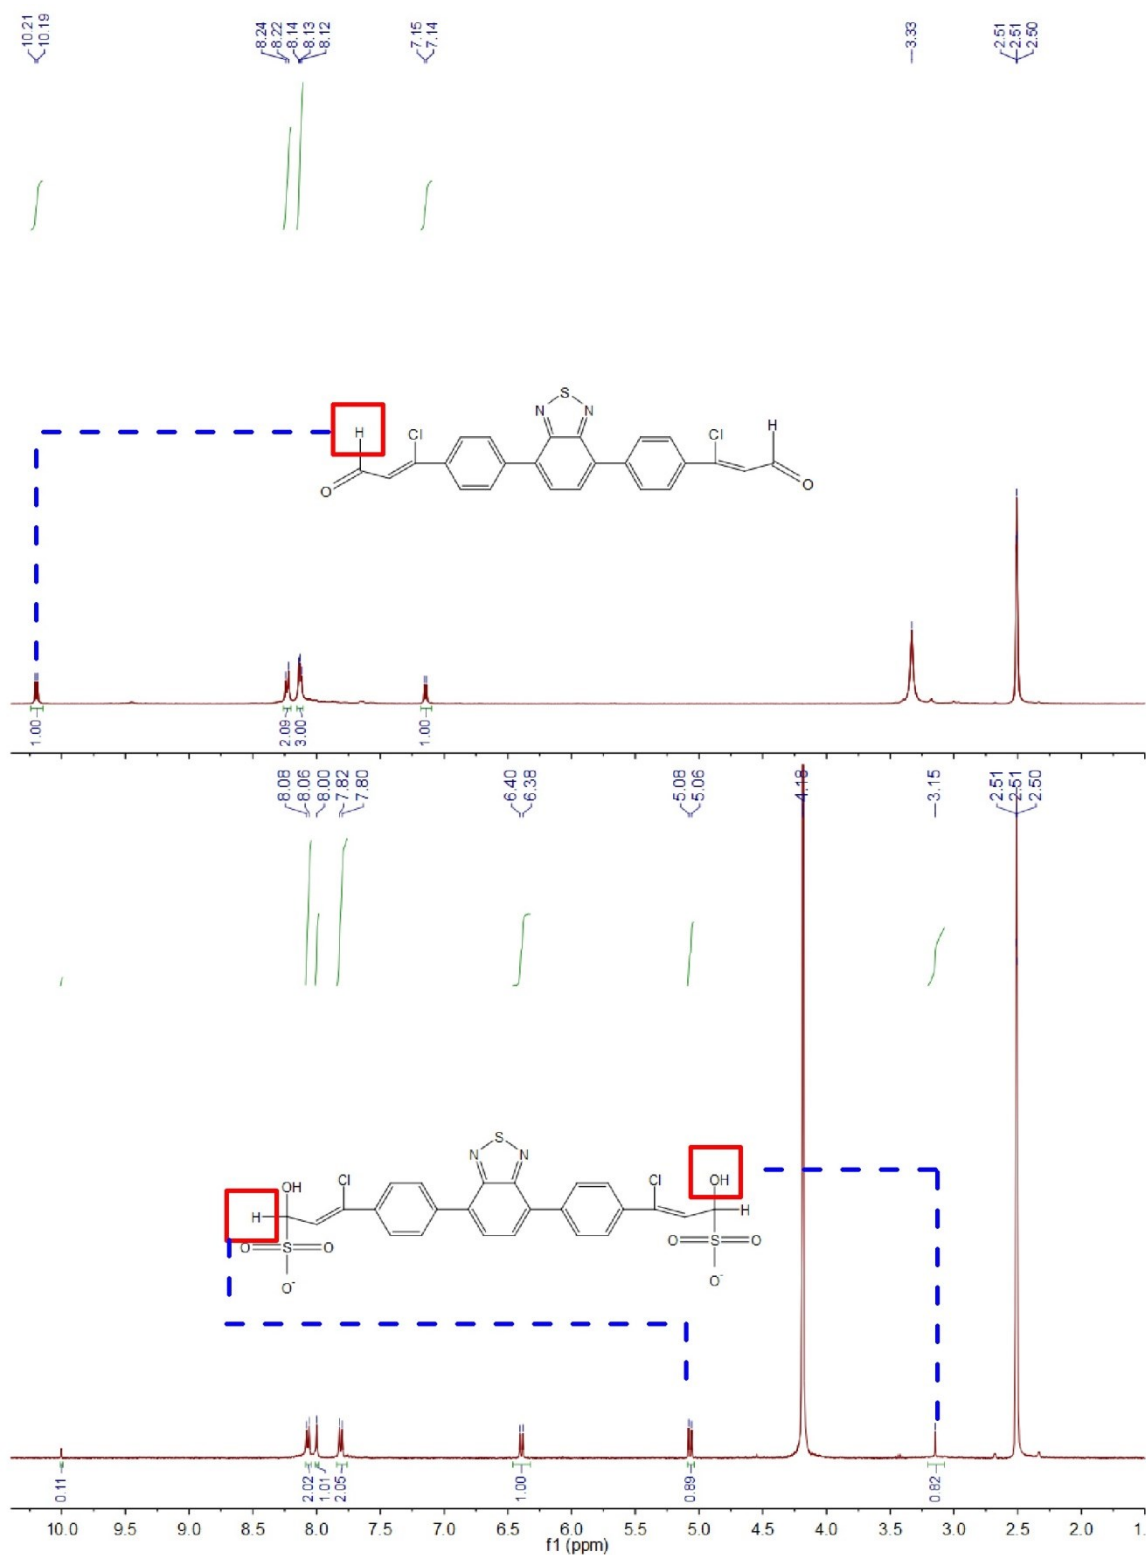

**Figure S5.** <sup>1</sup>H-NMR comparison of the probe BTC with the product BTC-HSO<sub>3</sub> upon addition of HSO<sub>3</sub><sup>-</sup> in DMSO-*d*<sub>6</sub> and D<sub>2</sub>O (*V/V*=7:3).

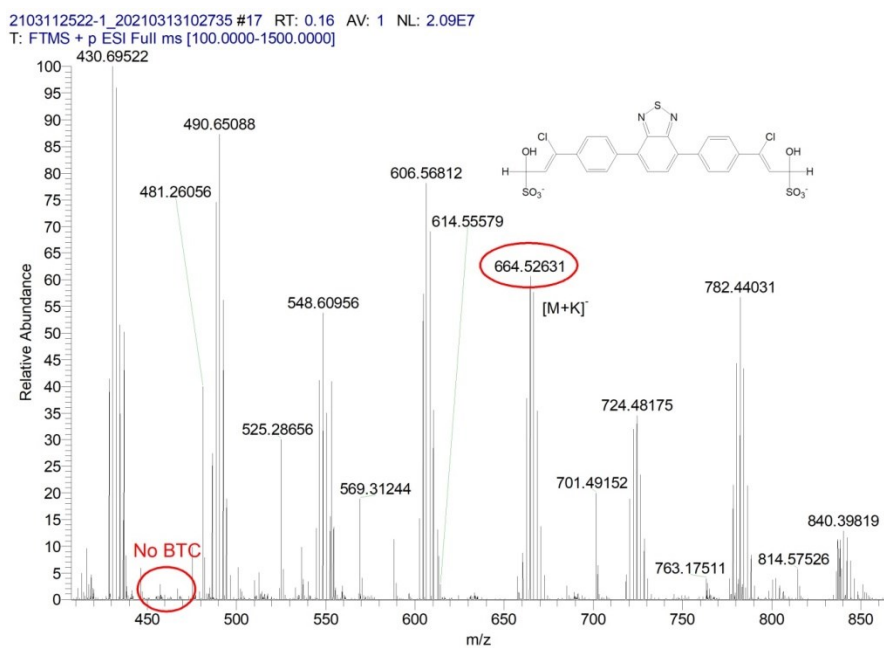

**Figure S6.** HR-MS of the reaction mixture of BTC and  $\text{HSO}_3^-$ .

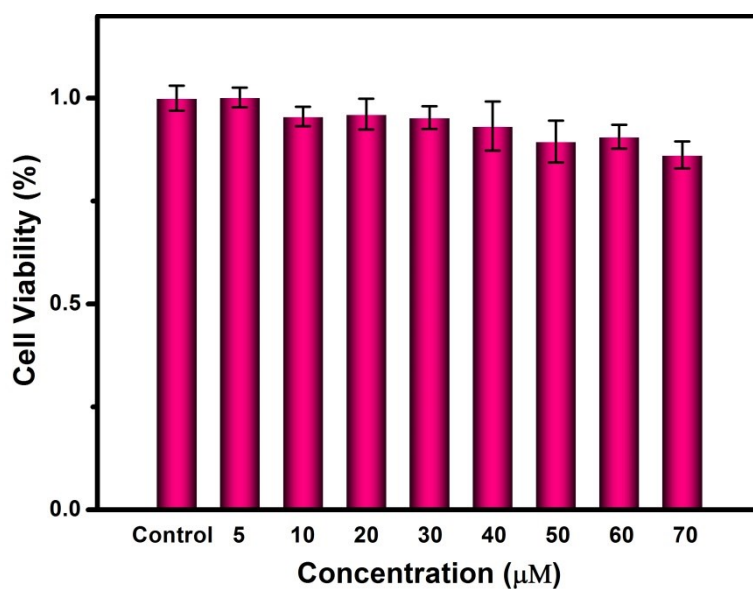

**Figure S7.** The viability of HeLa cells treated by BTC probe with various concentrations for 24 h.

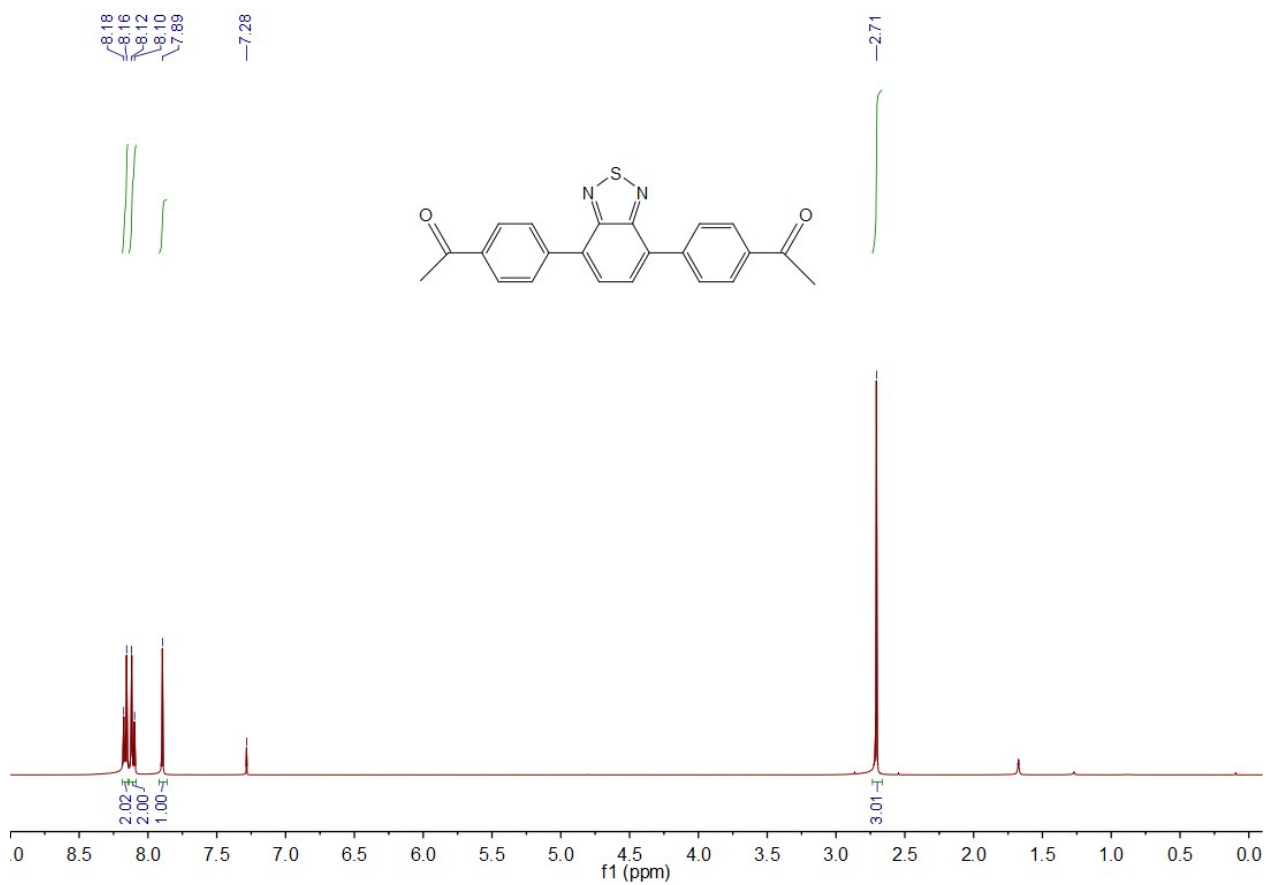

**Figure S8.** <sup>1</sup>H NMR of Product 1.

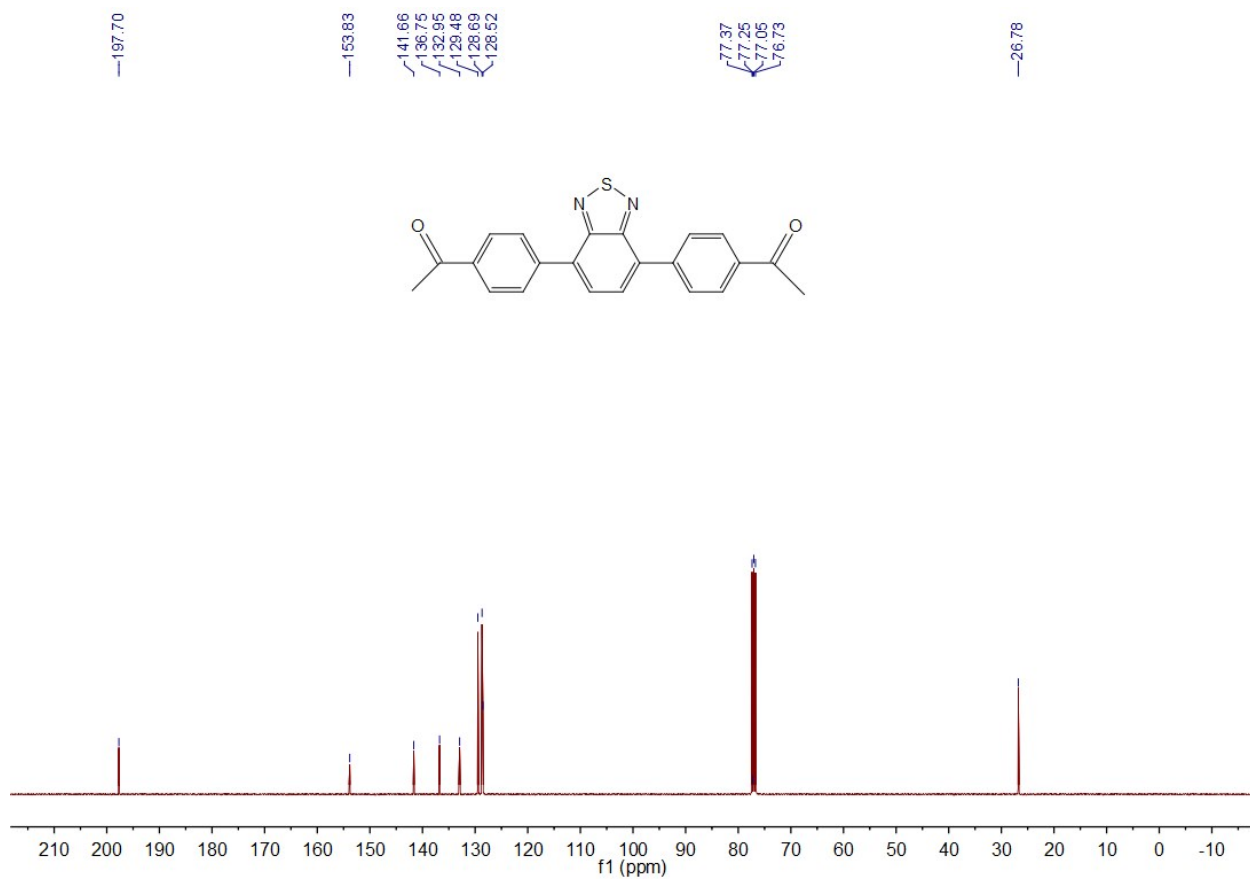

**Figure S9.** <sup>13</sup>C NMR of Product 1.



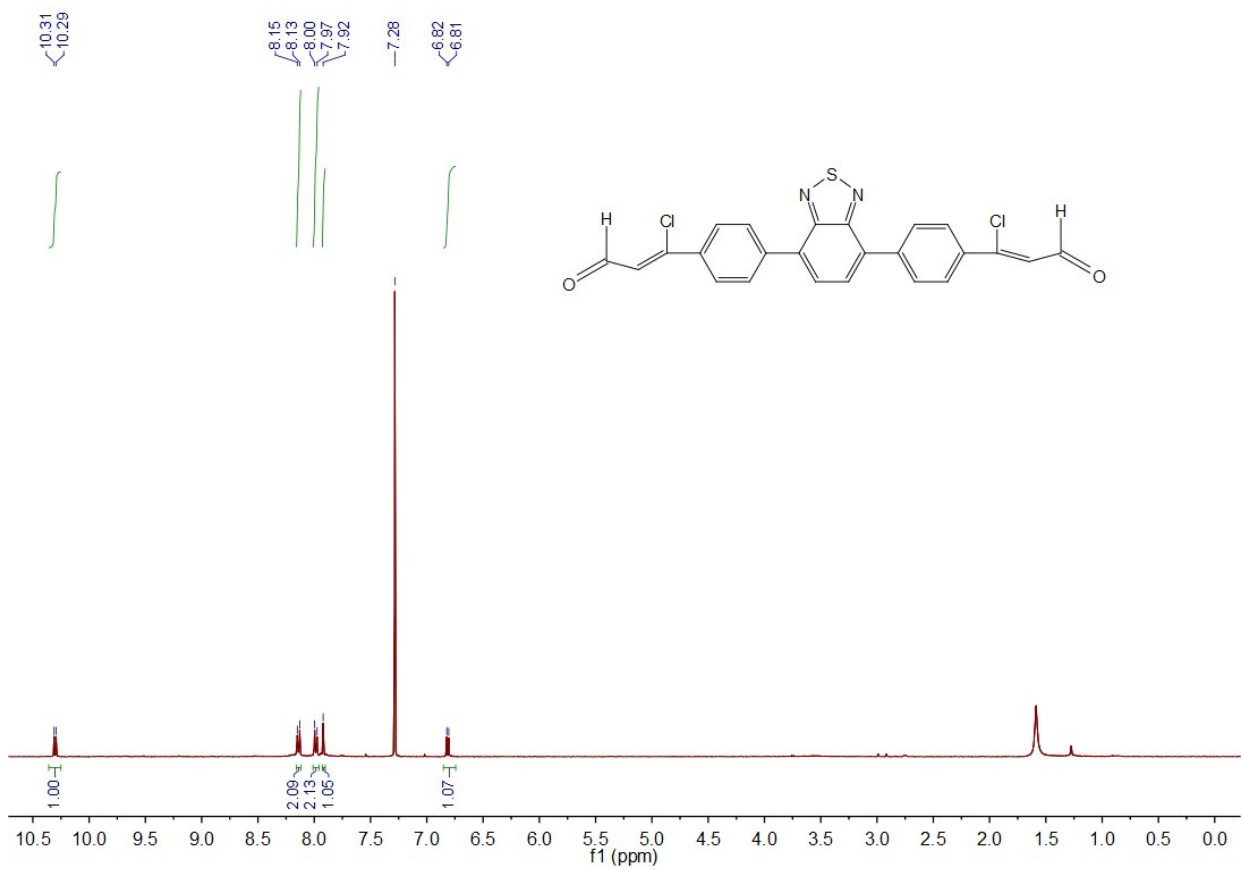

Figure S10.  $^1\text{H}$  NMR of BTC.

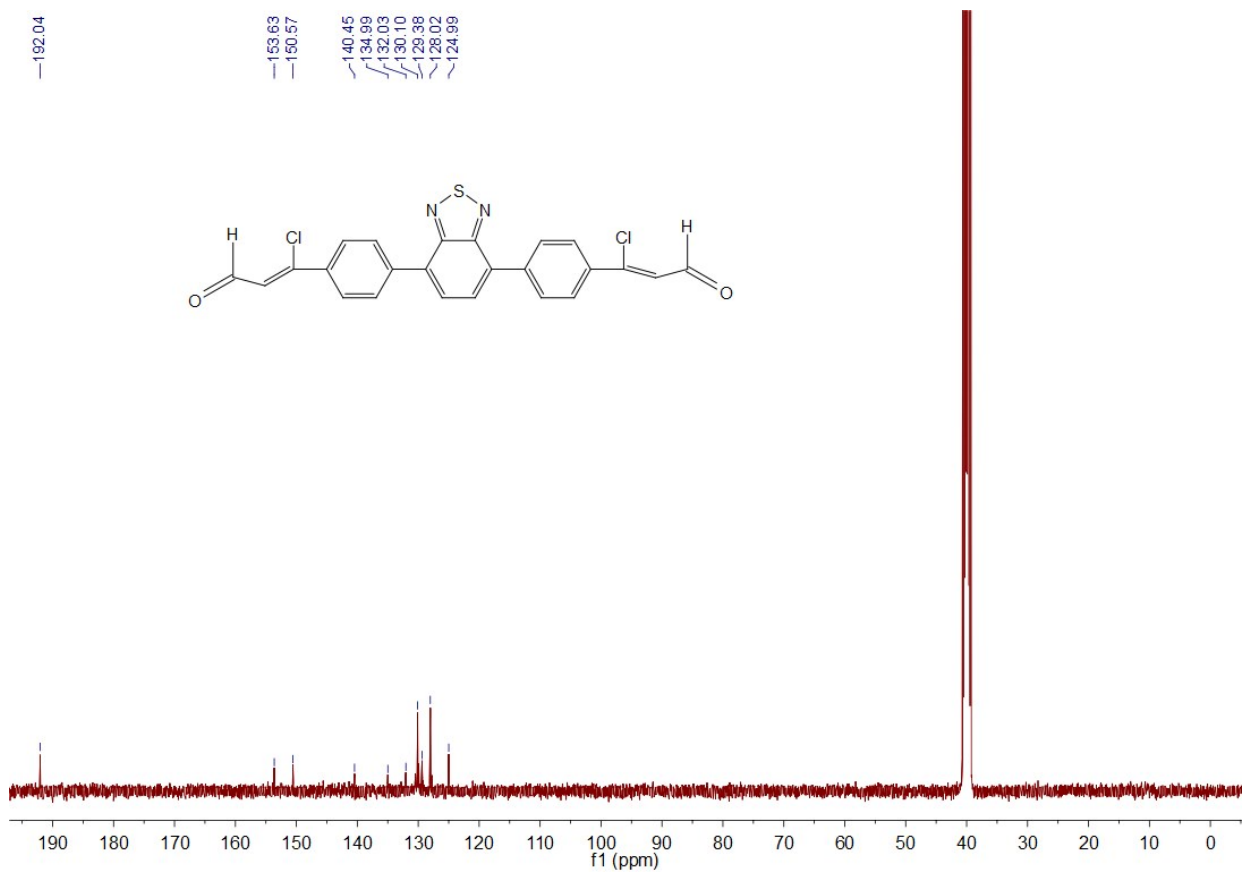

Figure S11.  $^{13}\text{C}$  NMR of BTC.

## Supplementary References

- (1) N. S. Makarov, M. Drobizhev, A. Rebane, *Opt. Express*, 2008, **16**, 4029-4047.
- (2) C. Xu, W. W. Webb, *J. Opt. Soc. Am. B*, 1996, **13**, 481-491.
